# Supplementary material
Source: PubMed Central journal article supplement (PMC7240648)
Supplement: jamasurg-155-617-s001.pdf [file jamasurg-155-617-s001.pdf]

## Supplementary Online Content

Eryigit Ö, van der Graaf FW, Nieuwenhuijs VB, et al. Association of video completed by audio in laparoscopic cholecystectomy with improvements in operative reporting. *JAMA Surg*. Published online May 20, 2020. doi:10.1001/jamasurg.2020.0741

**eAppendix.** Requirements for an adequate video recording, audio recording, and operative note.

**eTable.** Independent reviewer form.

**eFigure.** Flow diagram summarizing the steps taken to conduct this study.

This supplementary material has been provided by the authors to give readers additional information about their work.

## **eAppendix. Requirements for an adequate video recording, audio recording, and operative note**

Based on an evidence-based Dutch guideline: Diagnosis and treatment of cholelithiasis. Association of Surgeons of the Netherlands (NVvH); 2016. [Available from: [https://heelkunde.nl/sites/heelkunde.nl/files/richtlijnen-definitief/Richtlijn\\_Galsteenlijden\\_09032016.pdf](https://heelkunde.nl/sites/heelkunde.nl/files/richtlijnen-definitief/Richtlijn_Galsteenlijden_09032016.pdf)].

**Step 1:** Introduction and positioning of trocars under vision

- a) Introduction of the first accessory trocar under vision
- b) Introduction of the second accessory trocar under vision
- c) Introduction of the third accessory trocar under vision

**Step 2:** Inspection of surgery site

- a) Inspection and description of the gallbladder condition
- b) Inspection and description of the liver condition

**Step 3:** Circumferential dissection of the cystic duct and the cystic artery

**Step 4:** Transection of the cystic artery (by clipping or sealing)

**Step 5:** Transection of the cystic duct (by clipping or sealing)

**Step 6:** Removal of the gallbladder from the liver bed

**Step 7:** Inspection of liver hemostasis

**Step 8:** Presence of bile or stone spill

**Step 9:** Use of saline irrigation (if used)

**Step 10:** Placement of drain (if present)

**Step 11:** Removal of trocars under vision and check for port side bleeding (intraperitoneal trocar sites)

- a) Removal of the first accessory trocar under vision
- b) Removal of the second accessory trocar under vision
- c) Removal of the third accessory trocar under vision

**eTable. Independent reviewer form**

## LAPAROSCOPIC CHOLECYSTECTOMY INDEPENDENT REVIEWER FORM (SONAR-TRIAL)

ANONYMIZED CASE  
IDENTIFICATION CODE

|  |  |  |  |  |  |  |  |  |  |
|--|--|--|--|--|--|--|--|--|--|
|  |  |  |  |  |  |  |  |  |  |
|--|--|--|--|--|--|--|--|--|--|

REVIEW DATE

|   |   |   |   |   |   |   |   |
|---|---|---|---|---|---|---|---|
| D | D | M | M | Y | Y | Y | Y |
|---|---|---|---|---|---|---|---|

REVIEWER (INITIALS,  
LAST NAME)

|  |
|--|
|  |
|--|

## STEPS RECORDED

|            |                                                                     | VIDEO                           |                                | NOTE                            |                                | AUDIO                           |                                | COMMENTS |
|------------|---------------------------------------------------------------------|---------------------------------|--------------------------------|---------------------------------|--------------------------------|---------------------------------|--------------------------------|----------|
| <b>1a</b>  | Introduction of the first accessory trocar                          | Yes<br><input type="checkbox"/> | No<br><input type="checkbox"/> | Yes<br><input type="checkbox"/> | No<br><input type="checkbox"/> | Yes<br><input type="checkbox"/> | No<br><input type="checkbox"/> |          |
| <b>1b</b>  | Introduction of the second accessory trocar                         | Yes<br><input type="checkbox"/> | No<br><input type="checkbox"/> | Yes<br><input type="checkbox"/> | No<br><input type="checkbox"/> | Yes<br><input type="checkbox"/> | No<br><input type="checkbox"/> |          |
| <b>1c</b>  | Introduction of the third accessory trocar                          | Yes<br><input type="checkbox"/> | No<br><input type="checkbox"/> | Yes<br><input type="checkbox"/> | No<br><input type="checkbox"/> | Yes<br><input type="checkbox"/> | No<br><input type="checkbox"/> |          |
| <b>2a</b>  | Inspection of the gallbladder                                       | Yes<br><input type="checkbox"/> | No<br><input type="checkbox"/> | Yes<br><input type="checkbox"/> | No<br><input type="checkbox"/> | Yes<br><input type="checkbox"/> | No<br><input type="checkbox"/> |          |
| <b>2b</b>  | Inspection of the liver condition                                   | Yes<br><input type="checkbox"/> | No<br><input type="checkbox"/> | Yes<br><input type="checkbox"/> | No<br><input type="checkbox"/> | Yes<br><input type="checkbox"/> | No<br><input type="checkbox"/> |          |
| <b>3</b>   | Circumferential dissection of the cystic duct and the cystic artery | Yes<br><input type="checkbox"/> | No<br><input type="checkbox"/> | Yes<br><input type="checkbox"/> | No<br><input type="checkbox"/> | Yes<br><input type="checkbox"/> | No<br><input type="checkbox"/> |          |
| <b>4</b>   | Transection of the cystic artery                                    | Yes<br><input type="checkbox"/> | No<br><input type="checkbox"/> | Yes<br><input type="checkbox"/> | No<br><input type="checkbox"/> | Yes<br><input type="checkbox"/> | No<br><input type="checkbox"/> |          |
| <b>5</b>   | Transection of the cystic duct                                      | Yes<br><input type="checkbox"/> | No<br><input type="checkbox"/> | Yes<br><input type="checkbox"/> | No<br><input type="checkbox"/> | Yes<br><input type="checkbox"/> | No<br><input type="checkbox"/> |          |
| <b>6</b>   | Removal of the gallbladder from the liver bed                       | Yes<br><input type="checkbox"/> | No<br><input type="checkbox"/> | Yes<br><input type="checkbox"/> | No<br><input type="checkbox"/> | Yes<br><input type="checkbox"/> | No<br><input type="checkbox"/> |          |
| <b>7</b>   | Inspection of liver hemostasis                                      | Yes<br><input type="checkbox"/> | No<br><input type="checkbox"/> | Yes<br><input type="checkbox"/> | No<br><input type="checkbox"/> | Yes<br><input type="checkbox"/> | No<br><input type="checkbox"/> |          |
| <b>8</b>   | Presence of spill (clear or purulent bile, stones)                  | Yes<br><input type="checkbox"/> | No<br><input type="checkbox"/> | Yes<br><input type="checkbox"/> | No<br><input type="checkbox"/> | Yes<br><input type="checkbox"/> | No<br><input type="checkbox"/> |          |
| <b>9</b>   | Saline irrigation (if used)                                         | Yes<br><input type="checkbox"/> | No<br><input type="checkbox"/> | Yes<br><input type="checkbox"/> | No<br><input type="checkbox"/> | Yes<br><input type="checkbox"/> | No<br><input type="checkbox"/> |          |
| <b>10</b>  | Drain placement (if present)                                        | Yes<br><input type="checkbox"/> | No<br><input type="checkbox"/> | Yes<br><input type="checkbox"/> | No<br><input type="checkbox"/> | Yes<br><input type="checkbox"/> | No<br><input type="checkbox"/> |          |
| <b>11a</b> | Removal of the first accessory trocar                               | Yes<br><input type="checkbox"/> | No<br><input type="checkbox"/> | Yes<br><input type="checkbox"/> | No<br><input type="checkbox"/> | Yes<br><input type="checkbox"/> | No<br><input type="checkbox"/> |          |
| <b>11b</b> | Removal of the second accessory trocar                              | Yes<br><input type="checkbox"/> | No<br><input type="checkbox"/> | Yes<br><input type="checkbox"/> | No<br><input type="checkbox"/> | Yes<br><input type="checkbox"/> | No<br><input type="checkbox"/> |          |
| <b>11c</b> | Removal of the third accessory trocar                               | Yes<br><input type="checkbox"/> | No<br><input type="checkbox"/> | Yes<br><input type="checkbox"/> | No<br><input type="checkbox"/> | Yes<br><input type="checkbox"/> | No<br><input type="checkbox"/> |          |

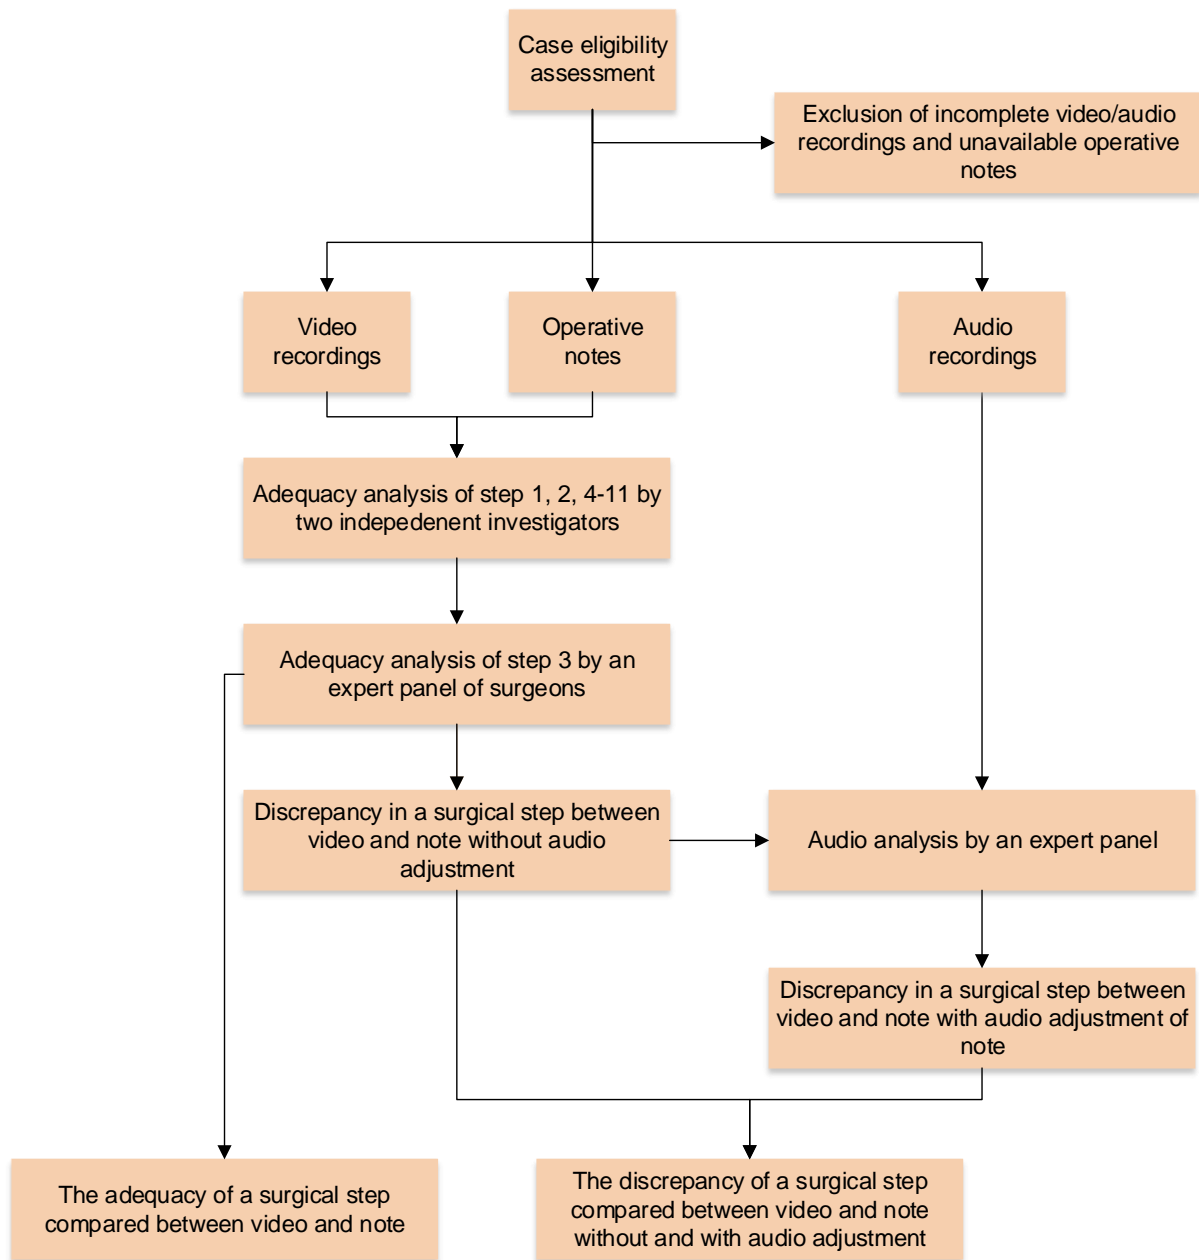

**eFigure - Flow diagram summarizing the steps taken to conduct this study**
